# Supplementary material for: Gatekeepers in the health financing scheme: Assessment of knowledge, attitude, practices, and participation of Malaysian private general practitioners in the PeKa B40 scheme
Source: PubMed Central journal article supplement (PMC10581488; doi:10.1371/journal.pone.0292516), 2023-10-17
Supplement: pone.0292516.s001.pdf [file pone.0292516.s001.pdf]

**S1 Table Knowledge of health financing schemes (N=296)** This table contains the various questionnaires and the responses for each as according to the 5-point Likert scale.

| No | Item                                                                                                                        | n (%)             |           |            |            |                |
|----|-----------------------------------------------------------------------------------------------------------------------------|-------------------|-----------|------------|------------|----------------|
|    |                                                                                                                             | Strongly disagree | Disagree  | Neutral    | Agree      | Strongly agree |
| 1  | Tax-based finance refers to finance resources derived from government revenues                                              | 6 (2.0)           | 11 (3.7)  | 93 (31.4)  | 106 (35.8) | 80 (27.0)      |
| 2  | Income tax is one revenue source for tax-based finance                                                                      | 2 (0.7)           | 4 (1.4)   | 55 (18.6)  | 123 (41.6) | 112 (37.8)     |
| 3  | Tax-based finance allows risk-sharing between the rich and the poor                                                         | 7 (2.4)           | 21 (7.1)  | 93 (31.4)  | 102 (34.5) | 73 (24.7)      |
| 4  | Tax-based finance allows healthcare access to each and every citizen                                                        | 7 (2.4)           | 22 (7.4)  | 72 (24.3)  | 112 (37.8) | 83 (28.0)      |
| 5  | Tax-based finance may lead to underfunding                                                                                  | 11 (3.7)          | 30 (10.1) | 129 (43.6) | 74 (25.0)  | 52 (17.6)      |
| 6  | Progressive taxation is an equitable form of direct taxation in tax-based finance.                                          | 3 (1.0)           | 8 (2.7)   | 158 (53.4) | 87 (29.4)  | 40 (13.5)      |
| 7  | The financial resources in Social Health Insurance (SHI) is derived from compulsory contributions from a particular sector. | 14 (4.7)          | 13 (4.4)  | 87 (29.4)  | 133 (44.9) | 49 (16.6)      |
| 8  | SHI systems are heavily dependent on payroll contributions                                                                  | 1 (0.3)           | 10 (3.4)  | 97 (32.8)  | 132 (44.6) | 56 (18.9)      |
| 9  | In SHI, payment models can be either single or multi-payor systems                                                          | 2 (0.7)           | 5 (1.7)   | 99 (33.4)  | 132 (44.6) | 58 (19.6)      |
| 10 | Supervisory institutions are essential in a SHI system to monitor the funding bodies.                                       | 1 (0.3)           | 1 (0.3)   | 68 (23.0)  | 136 (45.9) | 90 (30.4)      |
| 11 | SHI systems can ensure equity of access to healthcare.                                                                      | 8 (2.7)           | 12 (4.1)  | 91 (30.7)  | 115 (38.9) | 70 (23.6)      |
| 12 | The ICARE system proposed by the Ministry of Health in 2010 included SHI as a component.                                    | 6 (2.0)           | 8 (2.7)   | 146 (49.3) | 97 (32.8)  | 39 (13.2)      |
| 13 | SHI systems are more costly than tax-based systems to manage                                                                | 3 (1.0)           | 23 (7.8)  | 172 (58.1) | 67 (22.6)  | 31 (10.5)      |
| 14 | The revenue base in SHI is usually smaller than tax-based finance                                                           | 5 (1.7)           | 25 (8.4)  | 190 (64.2) | 46 (15.5)  | 30 (10.1)      |
| 15 | SHI is not appropriate in a large informal sector                                                                           | 8 (2.7)           | 31 (10.5) | 167 (56.4) | 57 (19.3)  | 33 (11.1)      |
| 16 | Contributions to SHI are compulsory.                                                                                        | 7 (2.4)           | 25 (8.4)  | 111 (37.5) | 93 (31.4)  | 60 (20.3)      |
| 17 | Private insurance refers to insurance plans from the private sector as                                                      | 2 (0.7)           | 12 (4.1)  | 65 (22.0)  | 126 (42.6) | 91 (30.7)      |

| No | Item                                                                                                     | n (%)             |          |           |            |                |
|----|----------------------------------------------------------------------------------------------------------|-------------------|----------|-----------|------------|----------------|
|    |                                                                                                          | Strongly disagree | Disagree | Neutral   | Agree      | Strongly agree |
|    | opposed to government-funded health finances.                                                            |                   |          |           |            |                |
| 18 | Private insurance is classified as complementary if the coverage is for services excluded by the state   | 7 (2.4)           | 8 (2.7)  | 94 (31.8) | 115 (38.9) | 72 (24.3)      |
| 19 | 19. Private insurance is classified as supplementary if the coverage is for faster access to healthcare. | 5 (1.7)           | 10 (3.4) | 73 (24.7) | 127 (42.9) | 81 (27.4)      |
| 20 | Unregulated private insurance can lead to unethical practices such as profiteering.                      | 1 (0.3)           | 8 (2.7)  | 43 (14.5) | 82 (27.7)  | 162 (54.7)     |
| 21 | The existence of a private supplemental insurance can lead to unwarranted referrals.                     | 5 (1.7)           | 24 (8.1) | 57 (19.3) | 125 (42.2) | 85 (28.7)      |
| 22 | Private insurance may have a biased preference for clients with good risks known as “cream-skimming” .   | 0                 | 9 (3.0)  | 74 (25.0) | 113 (38.2) | 100 (33.8)     |
| 23 | Private insurance is based on ability to pay                                                             | 2 (0.7)           | 7 (2.4)  | 35 (11.8) | 115 (38.9) | 137 (46.3)     |
| 24 | Private insurance is not the preferred choice for Universal Health Coverage                              | 5 (1.7)           | 24 (8.1) | 96 (32.4) | 86 (29.1)  | 85 (28.7)      |
