# Supplementary material for: Gatekeepers in the health financing scheme: Assessment of knowledge, attitude, practices, and participation of Malaysian private general practitioners in the PeKa B40 scheme
Source: PubMed Central journal article supplement (PMC10581488; doi:10.1371/journal.pone.0292516), 2023-10-17
Supplement: pone.0292516.s002.pdf [file pone.0292516.s002.pdf]

**S2 Table Knowledge of gatekeeper roles (N=296)** The contents of this table focus on the responses to each aspect of the gatekeeper role as according to the 5-point Likert scale.

| No | Item                                                                                                                                                                                                        | n (%)             |           |           |            |                |
|----|-------------------------------------------------------------------------------------------------------------------------------------------------------------------------------------------------------------|-------------------|-----------|-----------|------------|----------------|
|    |                                                                                                                                                                                                             | Strongly disagree | Disagree  | Neutral   | Agree      | Strongly agree |
| 1  | A GP gatekeeper triages the patient's further access to the health system                                                                                                                                   | 1 (0.3)           | 2 (0.7)   | 20 (6.8)  | 114 (38.5) | 159 (53.7)     |
| 2  | Gatekeeping systems can be either a full system whereby all patients must first be seen by a GP; or partial whereby patients are allowed to bypass the GP and be seen by the secondary specialist directly. | 18 (6.1)          | 26 (8.8)  | 60 (20.3) | 108 (36.5) | 84 (28.4)      |
| 3  | Gatekeeping improves the health system efficiency                                                                                                                                                           | 1 (0.3)           | 3 (1.0)   | 25 (8.4)  | 113 (38.2) | 154 (52.0)     |
| 4  | Gatekeeping enhances good coordination of patient care.                                                                                                                                                     | 0                 | 3 (1.0)   | 22 (7.4)  | 115 (38.9) | 156 (52.7)     |
| 5  | Gatekeeping reduces waiting times for specialist treatment                                                                                                                                                  | 1 (0.3)           | 12 (4.1)  | 44 (14.9) | 108 (36.5) | 131 (44.3)     |
| 6  | Effective gatekeeping requires a good referral system between private GPs and hospital specialists                                                                                                          | 0                 | 0         | 14 (4.7)  | 94 (31.8)  | 188 (63.5)     |
| 7  | Gatekeeping promotes quaternary prevention i.e. protect patients from unnecessary and harmful medical interventions                                                                                         | 0                 | 3 (1.0)   | 39 (13.2) | 111 (37.5) | 143 (48.3)     |
| 8  | Gatekeeping may cause delayed diagnosis of cancers                                                                                                                                                          | 68 (23.0)         | 87 (29.4) | 84 (28.4) | 45 (15.2)  | 12 (4.1)       |
