# Supplementary material for: Gatekeepers in the health financing scheme: Assessment of knowledge, attitude, practices, and participation of Malaysian private general practitioners in the PeKa B40 scheme
Source: PubMed Central journal article supplement (PMC10581488; doi:10.1371/journal.pone.0292516), 2023-10-17
Supplement: pone.0292516.s003.pdf [file pone.0292516.s003.pdf]

**S3 Table Knowledge of PeKa B40 (N=296)** This table indicates the responses according to the 5-point Likert scale on various aspects of the PeKa B40 scheme.

| No | Item                                                                                                      | n (%)             |           |            |            |                |
|----|-----------------------------------------------------------------------------------------------------------|-------------------|-----------|------------|------------|----------------|
|    |                                                                                                           | Strongly disagree | Disagree  | Neutral    | Agree      | Strongly agree |
| 1  | PeKa B40 is a pilot public-private partnership programme.                                                 | 6 (2.0)           | 7 (2.4)   | 73 (24.7)  | 115 (38.9) | 95 (32.1)      |
| 2  | In PeKa B40 program, GPs are involved only in screening and early detection of non-communicable diseases. | 8 (2.7)           | 13 (4.4)  | 40 (13.5)  | 134(45.30) | 101 (34.1)     |
| 3  | One of the primary objectives of PeKa B40 is screening of mental health.                                  | 6 (2.0)           | 20 (6.8)  | 78 (26.4)  | 117 (39.5) | 75 (25.3)      |
| 4  | ProtectHealth Corporation that manages the PeKa B40 scheme is not a Third Party Administrator.            | 20 (6.8)          | 45 (15.2) | 134 (45.3) | 57 (19.3)  | 40 (13.5)      |
| 5  | The PeKa B40 scheme covers those from the minimum age of 40 years old .                                   | 25 (8.4)          | 19 (6.4)  | 65 (22.0)  | 98 (33.1)  | 89 (30.1)      |
