# Supplementary material for: Gatekeepers in the health financing scheme: Assessment of knowledge, attitude, practices, and participation of Malaysian private general practitioners in the PeKa B40 scheme
Source: PubMed Central journal article supplement (PMC10581488; doi:10.1371/journal.pone.0292516), 2023-10-17
Supplement: pone.0292516.s004.pdf [file pone.0292516.s004.pdf]

**S4 Table Practice issues in PeKa B40 (N=296)** This table list the responses according to the 5-point Likert scale on various aspects of the consultation process in PeKa B40, including history, physical examination and investigation.

| No | Item                                                                         | n (%)             |          |            |            |                |
|----|------------------------------------------------------------------------------|-------------------|----------|------------|------------|----------------|
|    |                                                                              | Strongly disagree | Disagree | Neutral    | Agree      | Strongly agree |
| 1  | History A: Symptoms of the chronic disease                                   | 0                 | 1 (0.3)  | 16 (5.4)   | 107 (36.1) | 172 (58.1)     |
| 2  | History B: Past medical history                                              | 0                 | 1 (0.3)  | 13 (4.4)   | 104 (35.1) | 178 (60.1)     |
| 3  | History C: Family history of specific medical conditions                     | 0                 | 1 (0.3)  | 15 (5.1)   | 103 (34.8) | 177 (59.8)     |
| 4  | History D: Behavioral risk factors                                           | 1 (0.3)           | 0        | 20 (6.8)   | 108 (36.5) | 167 (56.4)     |
| 5  | History E: Mental health assessment                                          | 2 (0.7)           | 2 (0.7)  | 30 (10.1)  | 105 (35.5) | 157 (53.0)     |
| 6  | Physical examination A: Weight / Height / Body mass index                    | 0                 | 0        | 10 (3.4)   | 95 (32.1)  | 191 (64.5)     |
| 7  | Physical examination B: Vital signs: Blood pressure, temperature, pulse rate | 0                 | 0        | 10 (3.4)   | 88 (29.7)  | 198 (66.9)     |
| 8  | Physical examination C: General physical examination                         | 0                 | 0        | 12 (4.1)   | 91 (30.7)  | 193 (65.2)     |
| 9  | Physical examination D: Specific systemic examination                        | 1 (0.3)           | 0        | 25 (8.4)   | 101 (34.1) | 169 (57.1)     |
| 10 | Physical examination E: Clinical breast examination (for females)            | 1 (0.3)           | 5 (1.7)  | 45 (15.2)  | 104 (35.1) | 141 (47.6)     |
| 11 | Physical examination F: Digital rectal examination                           | 10 (3.4)          | 21 (7.1) | 121 (40.9) | 73 (24.7)  | 71 (24.0)      |
| 12 | Investigation A: Urine biochemistry                                          | 0                 | 0        | 26 (8.8)   | 109 (36.8) | 161 (54.4)     |
| 13 | Investigation B: Full blood count                                            | 0                 | 2 (0.7)  | 27 (9.1)   | 111 (37.5) | 156 (52.7)     |
| 14 | Investigation C: Renal profile                                               | 0                 | 0        | 27 (9.1)   | 105 (35.5) | 164 (55.4)     |
| 15 | Investigation D: HbA1 C                                                      | 0                 | 5 (1.7)  | 30 (10.1)  | 107 (36.1) | 154 (52.0)     |
| 16 | Investigation E: Lipid profile                                               | 0                 | 0        | 25 (8.4)   | 100 (33.8) | 171 (57.8)     |
