# Supplementary material for: Gatekeepers in the health financing scheme: Assessment of knowledge, attitude, practices, and participation of Malaysian private general practitioners in the PeKa B40 scheme
Source: PubMed Central journal article supplement (PMC10581488; doi:10.1371/journal.pone.0292516), 2023-10-17
Supplement: pone.0292516.s005.pdf [file pone.0292516.s005.pdf]

**S5 Table Attitude towards health financing scheme** This table assesses the responses according to the 5-point Likert scale in reference to the attitude towards remuneration, tax-based finance, social health insurance and private insurance.

| No | Item                                                                                                                               | n (%)             |          |            |            |                |
|----|------------------------------------------------------------------------------------------------------------------------------------|-------------------|----------|------------|------------|----------------|
|    |                                                                                                                                    | Strongly disagree | Disagree | Neutral    | Agree      | Strongly agree |
| 1  | Remuneration for Malaysian private GPs should be based on Capitation on consultation                                               | 11 (3.7)          | 21 (7.1) | 53 (17.9)  | 119 (40.2) | 92 (31.1)      |
| 2  | Remuneration for Malaysian private GPs should be based on Fee for Service for Procedures & minor surgeries.                        | 3 (1.0)           | 4 (1.4)  | 29 (9.8)   | 125 (42.2) | 135 (45.6)     |
| 3  | Remuneration for Malaysian private GPs should include Health promotion and Disease                                                 | 0                 | 2 (0.7)  | 36 (12.2)  | 113 (38.2) | 145 (49.0)     |
| 4  | Remuneration for Malaysian GPs should include medication dispensing                                                                | 145 (49.0)        | 3 (1.0)  | 24 (8.1)   | 100 (33.8) | 164 (55.4)     |
| 5  | Tax-based finance is the best method for Malaysia                                                                                  | 7 (2.4)           | 17 (5.7) | 168 (56.8) | 66 (22.3)  | 38 (12.8)      |
| 6  | Tax-based finance in Malaysia offers government servants better benefits than private workers                                      | 9 (3.0)           | 18 (6.1) | 140 (47.3) | 78 (26.4)  | 51 (17.2)      |
| 7  | In tax-based finance, income-based tax is preferred to consumption tax because it allows collection from a larger income base.     | 10 (3.4)          | 11 (3.7) | 143 (48.3) | 96 (32.4)  | 36 (12.2)      |
| 8  | In tax-based finance , the Goods and Services tax should be implemented as an additional revenue source in Malaysia.               | 22 (7.4)          | 27 (9.1) | 130 (43.9) | 70 (23.6)  | 47 (15.9)      |
| 9  | Social health insurance (SHI) should be introduced in Malaysia to replace the tax-based finance system                             | 11 (3.7)          | 17 (5.7) | 143 (48.3) | 75 (25.3)  | 50 (16.9)      |
| 10 | SHI should be introduced in Malaysia in combination with the current tax-based system                                              | 9 (3.0)           | 10 (3.4) | 122 (41.2) | 105 (35.5) | 50 (16.9)      |
| 11 | If SHI is introduced in Malaysia, the poor should be covered by the government                                                     | 4 (1.4)           | 5 (1.7)  | 66 (22.3)  | 108 (36.5) | 113 (38.2)     |
| 12 | In SHI, a single payor involving only one entity as the paymaster is preferred over multi-payors which involve several paymasters. | 5 (1.7)           | 15 (5.1) | 150 (50.7) | 75 (25.3)  | 75 (25.3)      |
| 13 | Multiple benefit packages with differing coverage is preferred over a single package in SHI                                        | 5 (1.7)           | 11 (3.7) | 109 (36.8) | 112 (37.8) | 59 (19.9)      |

| No | Item                                                                                         | n (%)             |          |            |            |                |
|----|----------------------------------------------------------------------------------------------|-------------------|----------|------------|------------|----------------|
|    |                                                                                              | Strongly disagree | Disagree | Neutral    | Agree      | Strongly agree |
| 14 | Private insurance in Malaysia should not substitute the current tax-based system in Malaysia | 7 (2.4)           | 12 (4.1) | 116 (39.2) | 87 (29.4)  | 74 (25.0)      |
| 15 | Private insurance is preferred to play only a supplementary role                             | 4 (1.4)           | 20 (6.8) | 93 (31.4)  | 110 (37.2) | 69 (23.3)      |
