# Supplementary material for: Gatekeepers in the health financing scheme: Assessment of knowledge, attitude, practices, and participation of Malaysian private general practitioners in the PeKa B40 scheme
Source: PubMed Central journal article supplement (PMC10581488; doi:10.1371/journal.pone.0292516), 2023-10-17
Supplement: pone.0292516.s006.pdf [file pone.0292516.s006.pdf]

**S6 Table Attitude towards gatekeeper roles (N=296)** This table list the responses according to the 5-point Likert scale , on the attitude towards various aspects of the gatekeeper roles.

| No | Item                                                                                                          | n (%)             |          |            |            |                |
|----|---------------------------------------------------------------------------------------------------------------|-------------------|----------|------------|------------|----------------|
|    |                                                                                                               | Strongly disagree | Disagree | Neutral    | Agree      | Strongly agree |
| 1  | In Malaysia, GPs should assume the full gatekeeper role whereby all patients must first be triaged by the GPs | 0                 | 17 (5.7) | 47 (15.9)  | 111 (37.5) | 121 (40.9)     |
| 2  | The gatekeeper system will benefit the practice of private Malaysian GPs                                      | 0                 | 5 (1.7)  | 35 (11.8)  | 125 (42.2) | 131 (44.3)     |
| 3  | Private GPs in Malaysia must be vocationally-trained family physicians for effective gatekeeper roles.        | 13 (4.4)          | 29 (9.8) | 75 (25.3)  | 95 (32.1)  | 84 (28.4)      |
| 4  | The gatekeeper role for Malaysian GPs is only effective if the National Health Finance system is implemented. | 10 (3.4)          | 13 (4.4) | 103 (34.8) | 92 (31.1)  | 78 (26.4)      |
