# Supplementary material for: Gatekeepers in the health financing scheme: Assessment of knowledge, attitude, practices, and participation of Malaysian private general practitioners in the PeKa B40 scheme
Source: PubMed Central journal article supplement (PMC10581488; doi:10.1371/journal.pone.0292516), 2023-10-17
Supplement: pone.0292516.s007.pdf [file pone.0292516.s007.pdf]

**S7 Table Attitude towards PeKa B40 (N=296)** This table list the various responses according to the 5-point Likert scale on the attitude towards various aspects of the PeKa B40 scheme.

| No | Item                                                                                                                                 | n (%)             |           |            |            |                |
|----|--------------------------------------------------------------------------------------------------------------------------------------|-------------------|-----------|------------|------------|----------------|
|    |                                                                                                                                      | Strongly disagree | Disagree  | Neutral    | Agree      | Strongly agree |
| 1  | The current limited screening role of the Malaysian private GPs in PeKa B40 is acceptable.                                           | 25 (8.4)          | 53 (17.9) | 132 (44.6) | 65 (22.0)  | 21 (7.1)       |
| 2  | The current remuneration of RM60 for private GPs in PeKa B40 commensurate with the amount of work done.                              | 45 (15.2)         | 72 (24.3) | 111 (37.5) | 53 (17.9)  | 15 (5.1)       |
| 3  | The registration process for private GPs into the PeKa B40 provider scheme is not complicated.                                       | 16 (5.4)          | 36 (12.2) | 140 (47.3) | 74 (25.0)  | 30 (10.1)      |
| 4  | Participating private GPs in PeKa B40 should be remunerated to fully manage the detected cases with the appropriate medication.      | 2 (0.7)           | 6 (2.0)   | 70 (23.6)  | 123 (41.6) | 95 (32.1)      |
| 5  | The role of private GPs in PeKa B40 should be extended to health promotion activities such as exercise.                              | 3 (1.0)           | 6 (2.0)   | 60 (20.3)  | 128 (43.2) | 99 (33.4)      |
| 6  | The role of private GPs in PeKa B40 should also include all levels of Disease Prevention instead of just performing screening tests. | 2 (0.7)           | 1 (0.3)   | 43 (14.5)  | 125 (42.2) | 125 (42.2)     |
| 7  | Private GPs engaging in Health promotion and Disease prevention activities in PeKa B40 should be remunerated accordingly.            | 0                 | 0         | 42 (14.2)  | 126 (42.6) | 128 (43.2)     |
| 8  | Private GPs in PeKa B40 should be incorporated in multidisciplinary long term care initiatives with public healthcare facilities     | 1 (0.3)           | 1 (0.3)   | 47 (15.9)  | 128 (43.2) | 119 (40.2)     |
