# Supplementary material for: Gatekeepers in the health financing scheme: Assessment of knowledge, attitude, practices, and participation of Malaysian private general practitioners in the PeKa B40 scheme
Source: PubMed Central journal article supplement (PMC10581488; doi:10.1371/journal.pone.0292516), 2023-10-17
Supplement: pone.0292516.s008.pdf [file pone.0292516.s008.pdf]

**S8 Table Acceptance and level of participation to the National Health Finance Scheme.**

**(NHFS) (N=296)** This table list the responses according to the 5-point Likert scale on the various issues related to the NHFS. This was to assess acceptance and level of participation in the NHFS.

| No | Item                                                                       | n (%)             |           |            |            |                |
|----|----------------------------------------------------------------------------|-------------------|-----------|------------|------------|----------------|
|    |                                                                            | Strongly disagree | Disagree  | Neutral    | Agree      | Strongly agree |
| 1  | A National Health Finance System (NHFS) SHOULD be implemented in Malaysia. | 6 (2.0)           | 12 (4.1)  | 88 (29.7)  | 95 (32.1)  | 95 (32.1)      |
| 2  | We NEED to implement a National Health Finance System (NHFS) URGENTLY.     | 13 (4.4)          | 22 (7.4)  | 113 (38.2) | 78 (26.4)  | 70 (23.6)      |
| 3  | I am committed to assume the Gatekeeper role in the NHFS.                  | 4 (1.4)           | 2 (0.7)   | 79 (26.7)  | 108 (36.5) | 103 (34.8)     |
| 4  | I am fully aware of the components of NHFS                                 | 9 (3.0)           | 40 (13.5) | 132 (44.6) | 67 (22.6)  | 48 (16.2)      |
| 5  | I am willing to advance my training in areas related to NHFS.              | 3 (1.0)           | 8 (2.7)   | 94 (31.8)  | 109 (36.8) | 82 (27.7)      |
| 6  | The PEKA B40 programme has the potential to develop into the NHFS          | 10 (3.4)          | 10 (3.4)  | 108 (36.5) | 101 (34.1) | 67 (22.6)      |
