# Supplementary material for: Gatekeepers in the health financing scheme: Assessment of knowledge, attitude, practices, and participation of Malaysian private general practitioners in the PeKa B40 scheme
Source: PubMed Central journal article supplement (PMC10581488; doi:10.1371/journal.pone.0292516), 2023-10-17
Supplement: pone.0292516.s009.pdf [file pone.0292516.s009.pdf]

**S9 Table Sources of information (N=296)** This table contains the responses according to the 5-point Likert scale, on the various sources of information for each category ie health financing schemes , gatekeeper role and PeKa B40.

| No                             | Item         | n (%)             |          |            |            |                |
|--------------------------------|--------------|-------------------|----------|------------|------------|----------------|
|                                |              | Strongly disagree | Disagree | Neutral    | Agree      | Strongly agree |
| <b>Health financing scheme</b> |              |                   |          |            |            |                |
| 1                              | Internet     | 3 (1.0)           | 1 (0.3)  | 33 (11.1)  | 119 (40.2) | 140 (47.3)     |
| 2                              | Mass media   | 2 (0.7)           | 9 (3.0)  | 75 (25.3)  | 114 (38.5) | 96 (32.4)      |
| 3                              | Social media | 6 (2.0)           | 16 (5.4) | 62 (20.9)  | 115 (38.9) | 97 (32.8)      |
| 4                              | Courses      | 2 (0.7)           | 7 (2.4)  | 67 (22.6)  | 103 (34.8) | 117 (39.5)     |
| 5                              | Societies    | 3 (1.0)           | 14 (4.7) | 85 (28.7)  | 116 (39.2) | 78 (26.4)      |
| 6                              | Peers        | 0                 | 8 (2.7)  | 82 (27.7)  | 129 (43.6) | 77 (26.0)      |
| 7                              | Journals     | 9 (3.0)           | 16 (5.4) | 76 (25.7)  | 113 (38.2) | 82 (27.7)      |
| <b>Gatekeeper roles</b>        |              |                   |          |            |            |                |
| 1                              | Internet     | 1 (0.3)           | 0        | 38 (12.8)  | 124 (41.9) | 133 (44.9)     |
| 2                              | Mass media   | 3 (1.0)           | 4 (1.4)  | 84 (28.4)  | 112 (37.8) | 93 (31.4)      |
| 3                              | Social media | 9 (3.0)           | 9 (3.0)  | 74 (25.0)  | 112 (37.8) | 89 (30.1)      |
| 4                              | Courses      | 4 (1.4)           | 6 (2.0)  | 70 (23.6)  | 112 (37.8) | 104 (35.1)     |
| 5                              | Societies    | 5 (1.7)           | 11 (3.7) | 94 (31.8)  | 111 (37.5) | 75 (25.3)      |
| 6                              | Peers        | 2 (0.7)           | 6 (2.0)  | 81 (27.4)  | 125 (42.2) | 82 (27.7)      |
| 7                              | Journals     | 6 (2.0)           | 13 (4.4) | 83 (28.0)  | 102 (34.5) | 92 (31.1)      |
| <b>PeKa B40</b>                |              |                   |          |            |            |                |
| 1                              | Internet     | 1 (0.3)           | 5 (1.7)  | 49 (16.6)  | 110 (37.2) | 131 (44.3)     |
| 2                              | Mass media   | 2 (0.7)           | 4 (1.4)  | 71 (24.0)  | 121 (40.9) | 98 (33.1)      |
| 3                              | Social media | 7 (2.4)           | 13 (4.4) | 74 (25.0)  | 105 (35.5) | 97 (32.8)      |
| 4                              | Courses      | 8 (2.7)           | 16 (5.4) | 103 (34.8) | 90 (30.4)  | 79 (26.7)      |
| 5                              | Societies    | 4 (1.4)           | 14 (4.7) | 97 (32.8)  | 102 (34.5) | 79 (26.7)      |
| 6                              | Peers        | 2 (0.7)           | 9 (3.0)  | 87 (29.4)  | 114 (38.5) | 84 (28.4)      |
| 7                              | Journals     | 17 (5.7)          | 20 (6.8) | 115 (38.9) | 82 (27.7)  | 62 (20.9)      |
